# Supplementary material
Source: Springer Nature journal article supplement (https://www.springermedizin.de/resource/supplementary/12992_2010_81_MOESM3_ESM.pdf/9616464)

# New ARVs recommended by WHO in 2006: ABC, FTC, TDF

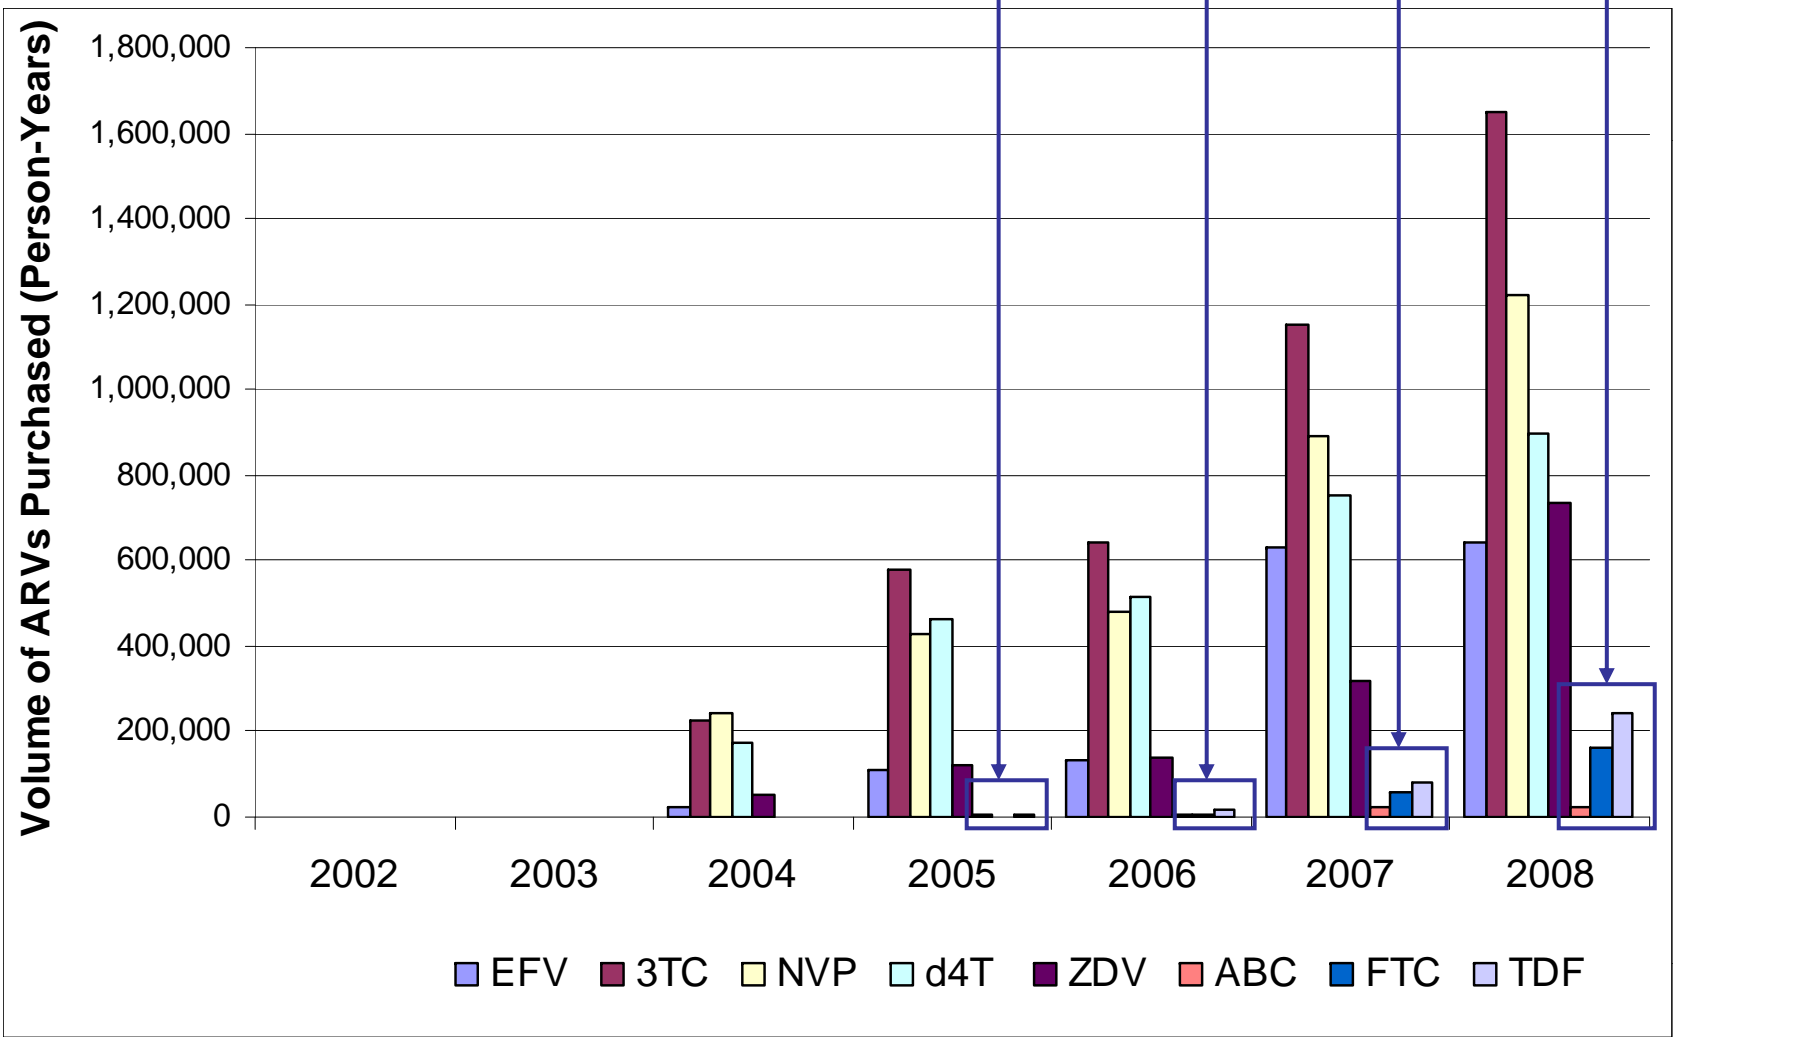

Supplement: MOESM3 [file 9616464]
